# Supplementary figures and images for: The Native Microbiome Member Chryseobacterium sp. CHNTR56 MYb120 Induces Trehalose Production via a Shift in Central Carbon Metabolism during Early Life in C. elegans
Source: MDPI journal article supplement (doi:10.3390/metabo13080953), 2023-08-18

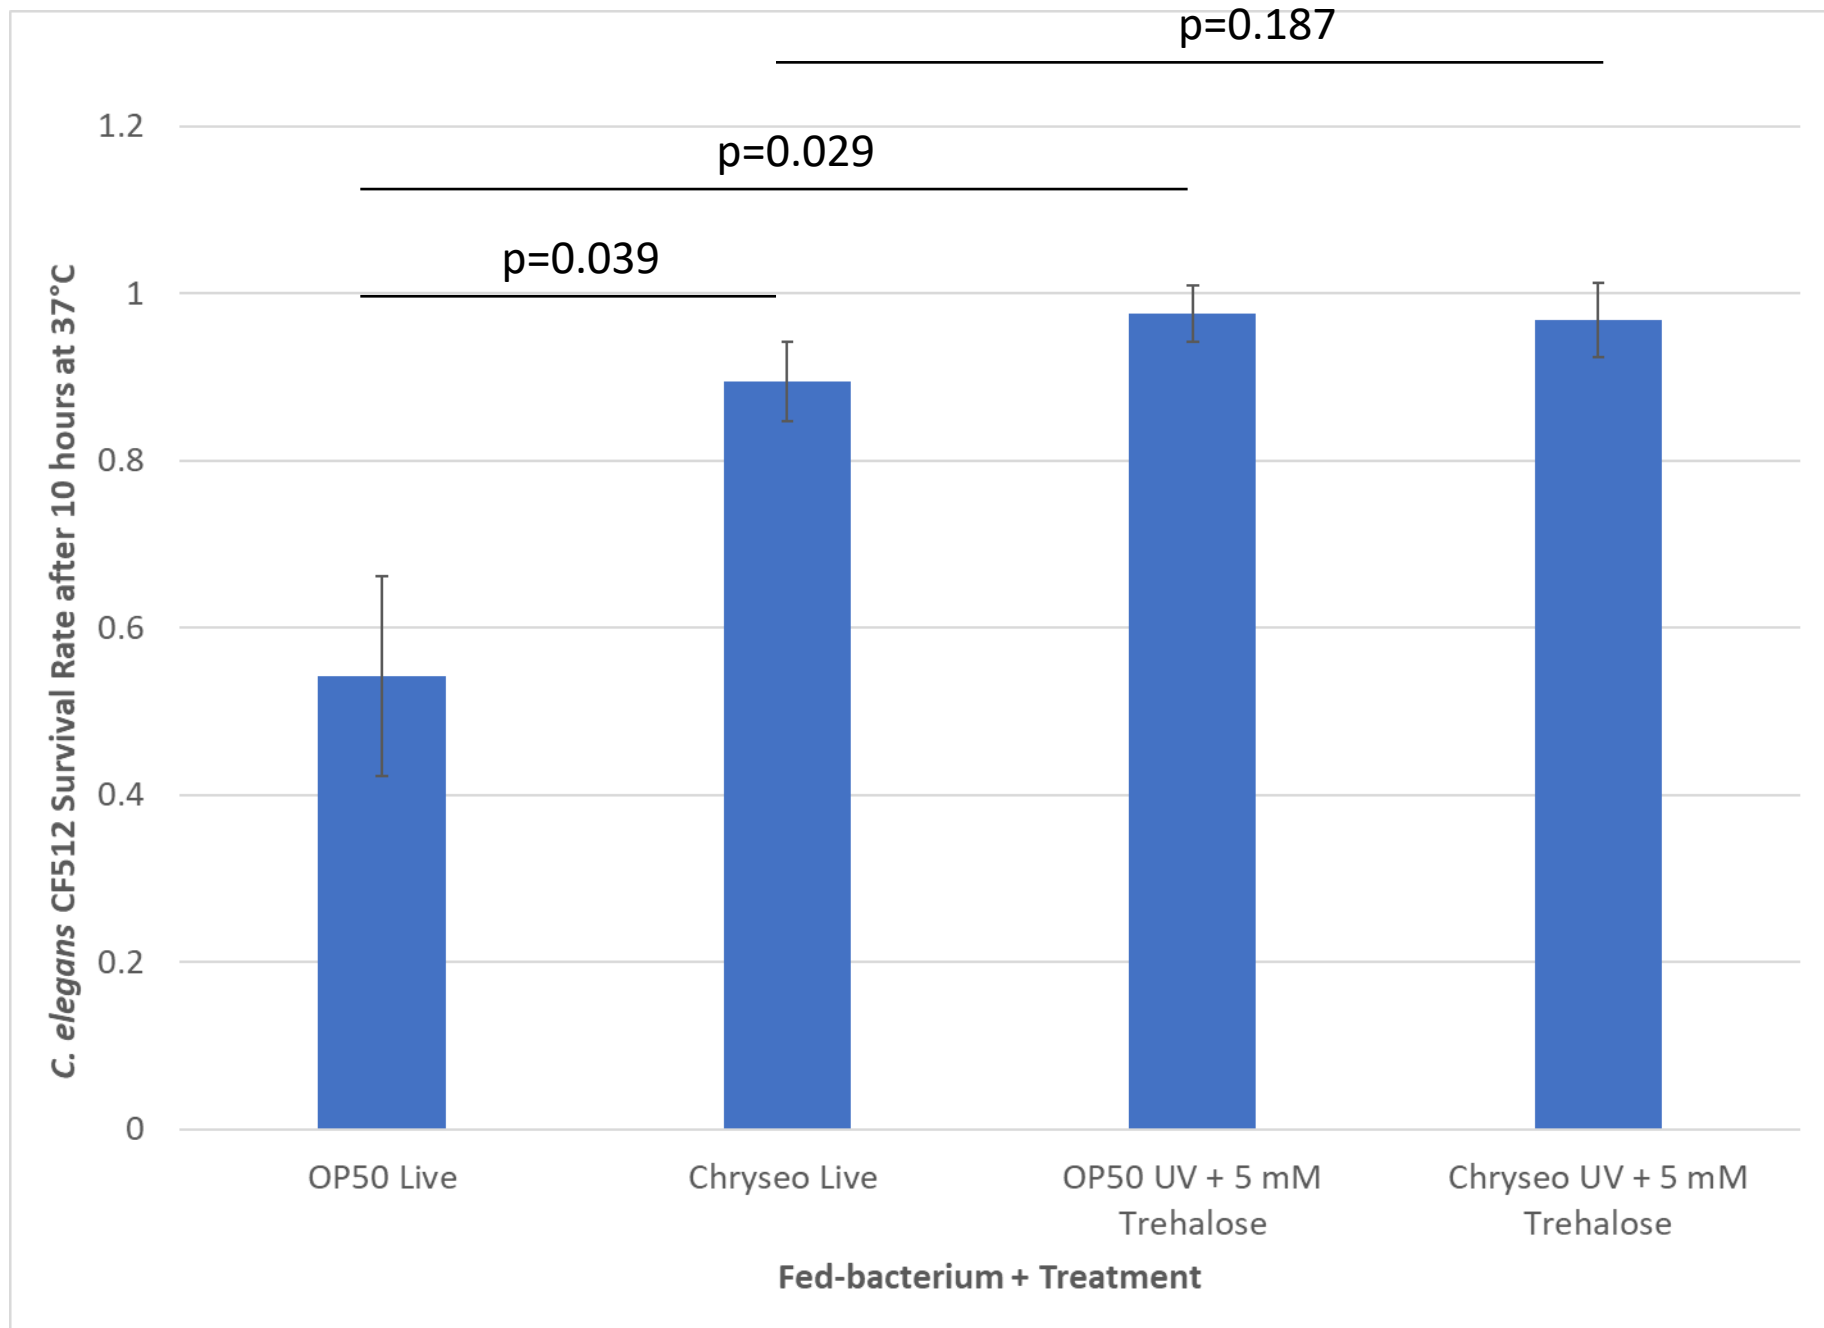

Supplement: s1 [file s1]

Adult Day 3 *C. elegans* Survival at 37°C

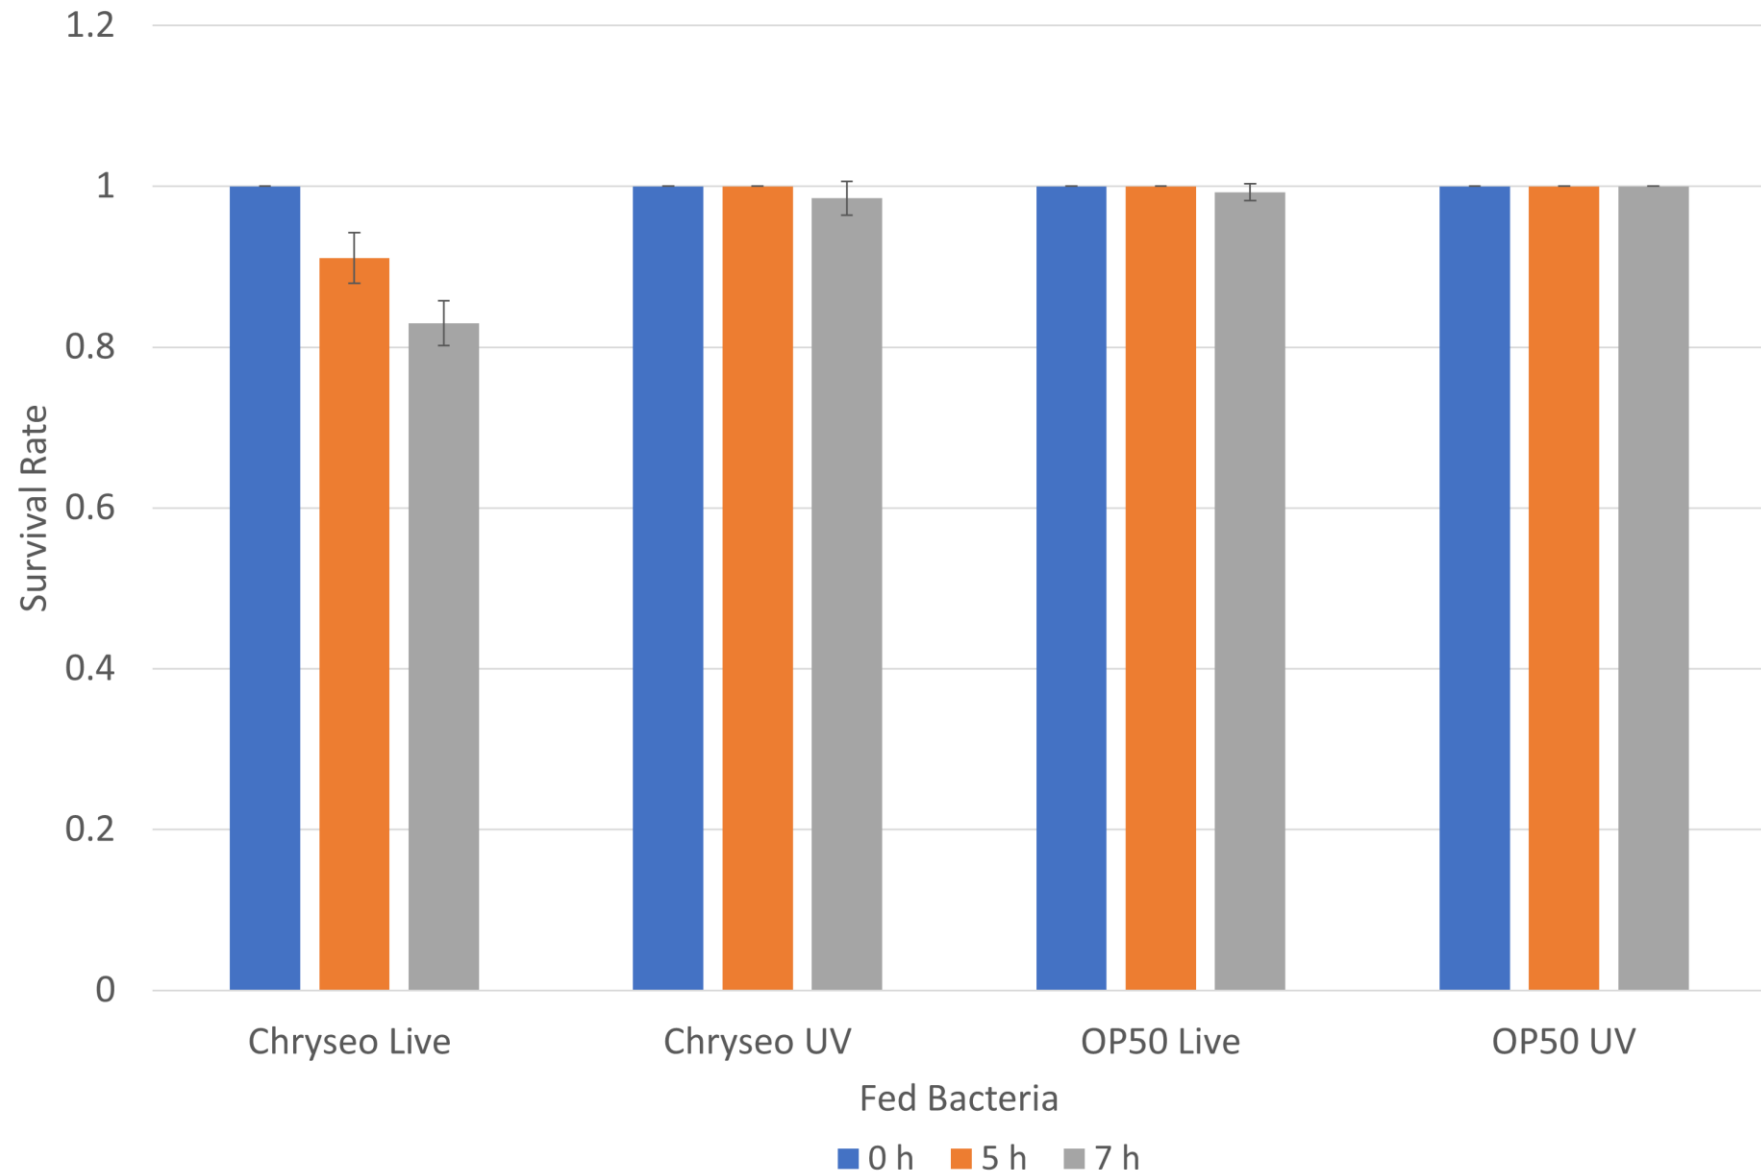

Supplement: s1 [file s1]
